# Supplementary material
Source: PubMed Central journal article supplement (PMC8884080)
Supplement: NIHMS1774340-supplement-supplementary_information.pdf [file NIHMS1774340-supplement-supplementary_information.pdf]

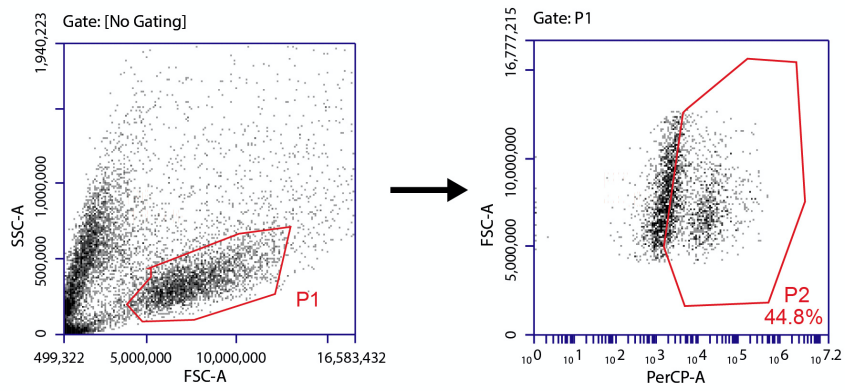

**Supplementary Figure 1 | An example of the gating strategy for flow cytometry in uptake assays.** After the P1 gate, nearly all cells (>97%) are singlets (based on FSC-A vs. FSC-H plot) across all samples. The left boundary of the P2 gate was set at the right edge of the mock-transfected cell population from the negative control sample (excluding ~ 98% of control cells).
